# Supplementary material for: Taqman qPCR Quantification and Fusarium Community Analysis to Evaluate Toxigenic Fungi in Cereals
Source: MDPI journal article supplement (doi:10.3390/toxins14010045), 2022-01-06
Supplement: s1 [file s1]

# Supplementary Materials: Taqman qPCR Quantification and *Fusarium* Community Analysis to Evaluate Toxigenic Fungi in Cereals

Elina Sohlberg, Vertti Virkajärvi, Päivi Parikka, Sari Rämö, Arja Laitila and Tuija Sarlin

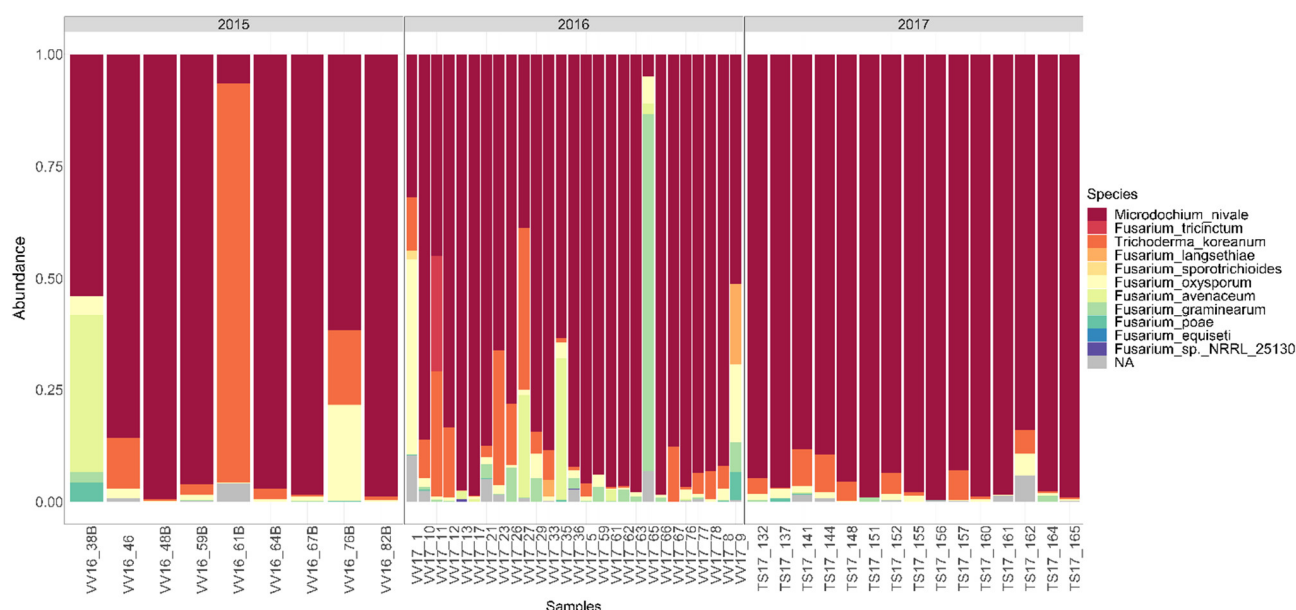

**Figure S1.** Relative abundance of all the species detected with the *Fusarium* metabarcoding method including non-*Fusarium* species in the oat samples in years 2015–2017. NA: *Fusarium* sp., not identified to species level.
